# Supplementary material for: Analysis of Genetic Variants Associated with Levels of Immune Modulating Proteins for Impact on Alzheimer’s Disease Risk Reveal a Potential Role for SIGLEC14
Source: MDPI journal article supplement (doi:10.3390/genes12071008), 2021-06-30
Supplement: s1 [file s1]

## **Supplementary Material**

### **Genetic variants associated with levels of immune modulating proteins are overrepresented as Alzheimer's Disease risk factors**

Benjamin C. Shaw, MS<sup>1,2</sup>, Yuriko Katsumata, PhD<sup>2,3</sup>, James Simpson, MS<sup>1,2</sup>, David Fardo, PhD<sup>2,3</sup>, and Steven Estus, PhD<sup>1,2\*</sup>

<sup>1</sup>*Department of Physiology, University of Kentucky*

<sup>2</sup>*Sanders-Brown Center on Aging, University of Kentucky*

<sup>3</sup>*Department of Biostatistics, University of Kentucky*

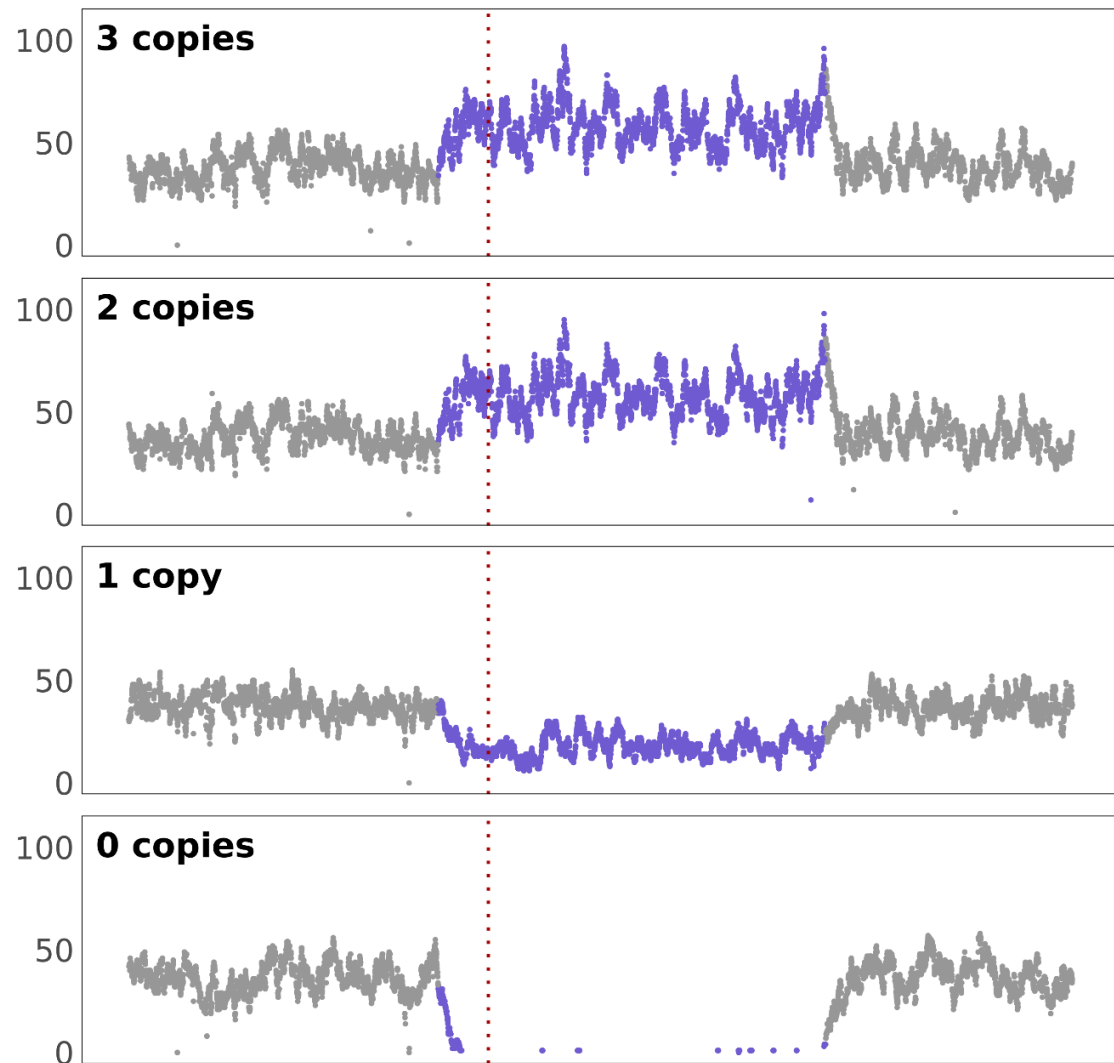

**Figure S1:** Whole genome sequencing (WGS) read depth data from the Alzheimer's Disease Sequencing Project (ASDP) in Caucasian population ( $n = 1041$ ) reveals copy number variation (CNV) in *SIGLEC14*, including deletions and duplications.

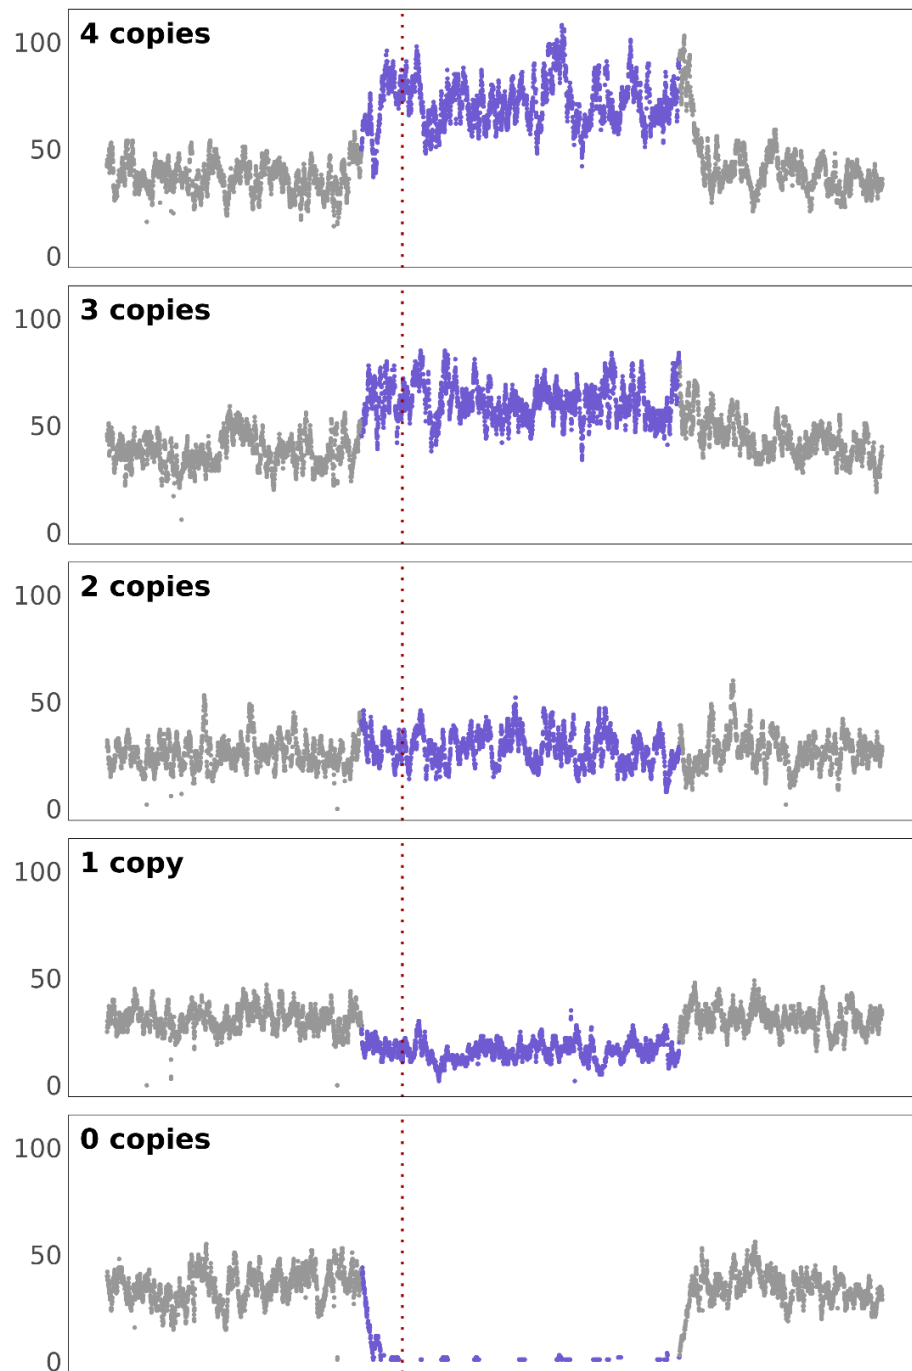

**Figure S2:** WGS read depth data from the ASDP in African American population (n = 998) reveals CNV in *SIGLEC14*, including deletions and duplications. Especially notable is the 4-allele carrier. Frequencies described in Table 4.

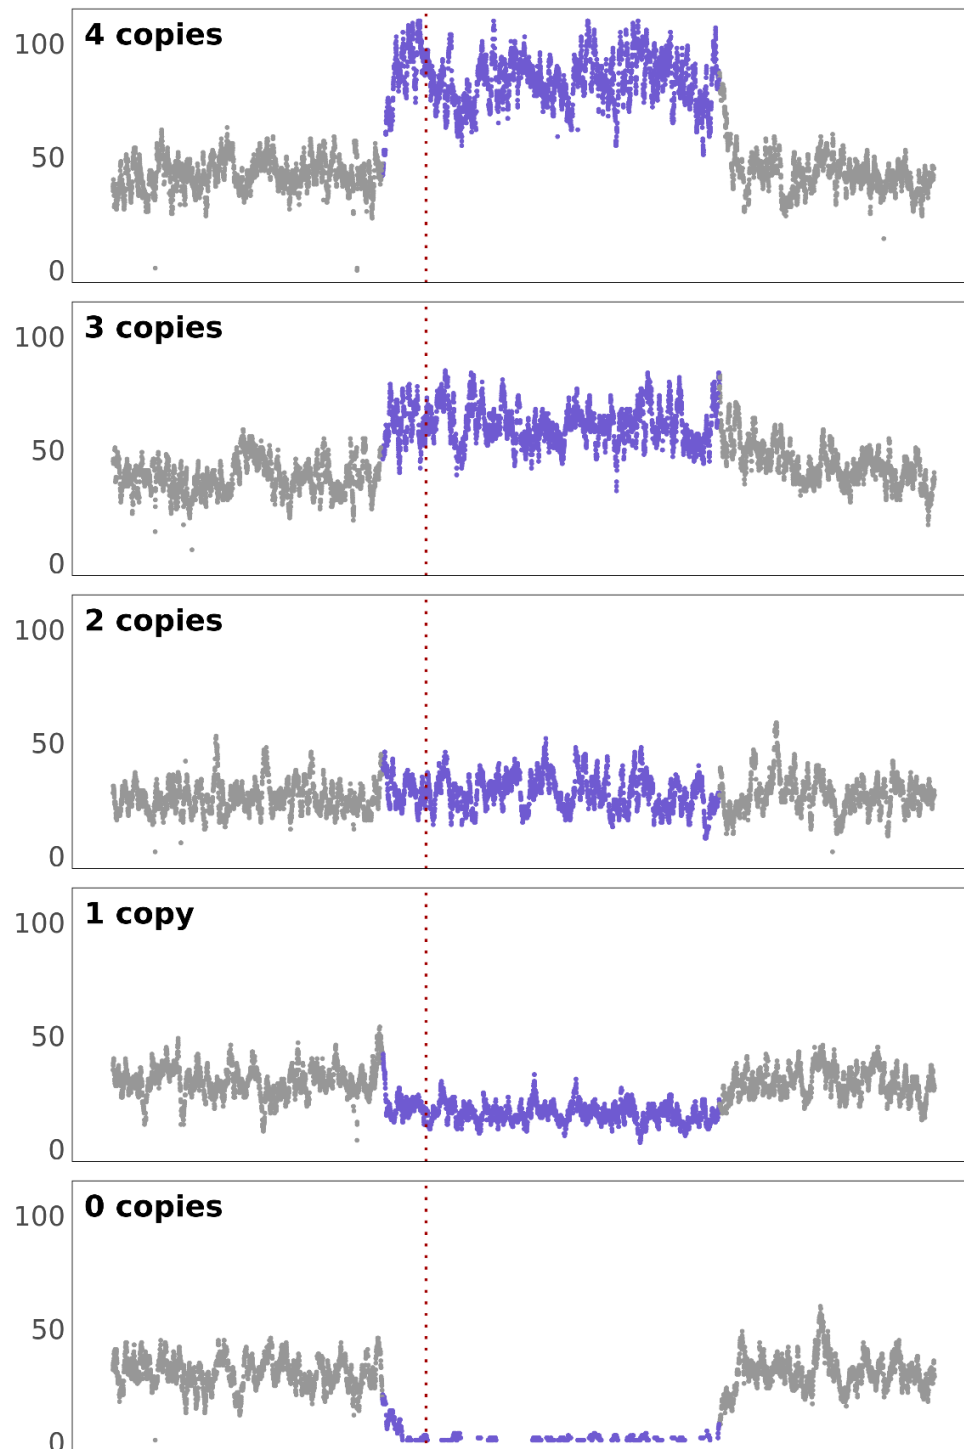

**Figure S3:** WGS read depth data from the ASDP in all other populations (n = 1056) reveals CNV in *SIGLEC14*, including deletions and duplications. Especially notable is the 4-allele carrier. Frequencies described in Table 4.

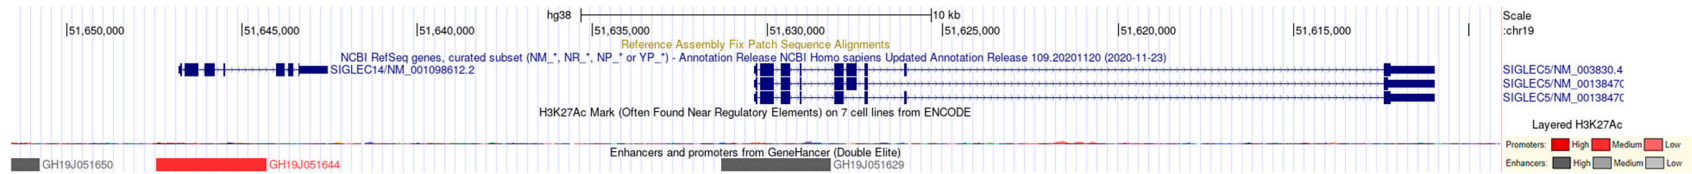

**Figure S4.** The *SIGLEC14* locus contains no H3K27Ac peaks nor regulatory elements between *SIGLEC14* and *SIGLEC5*. Expression of *SIGLEC14* is approximately ten times higher than *SIGLEC5* in individuals with both copies of *SIGLEC14*, while *SIGLEC5* expression is higher in individuals lacking *SIGLEC14* copies, in keeping with a common promoter or enhancer governing the single locus.

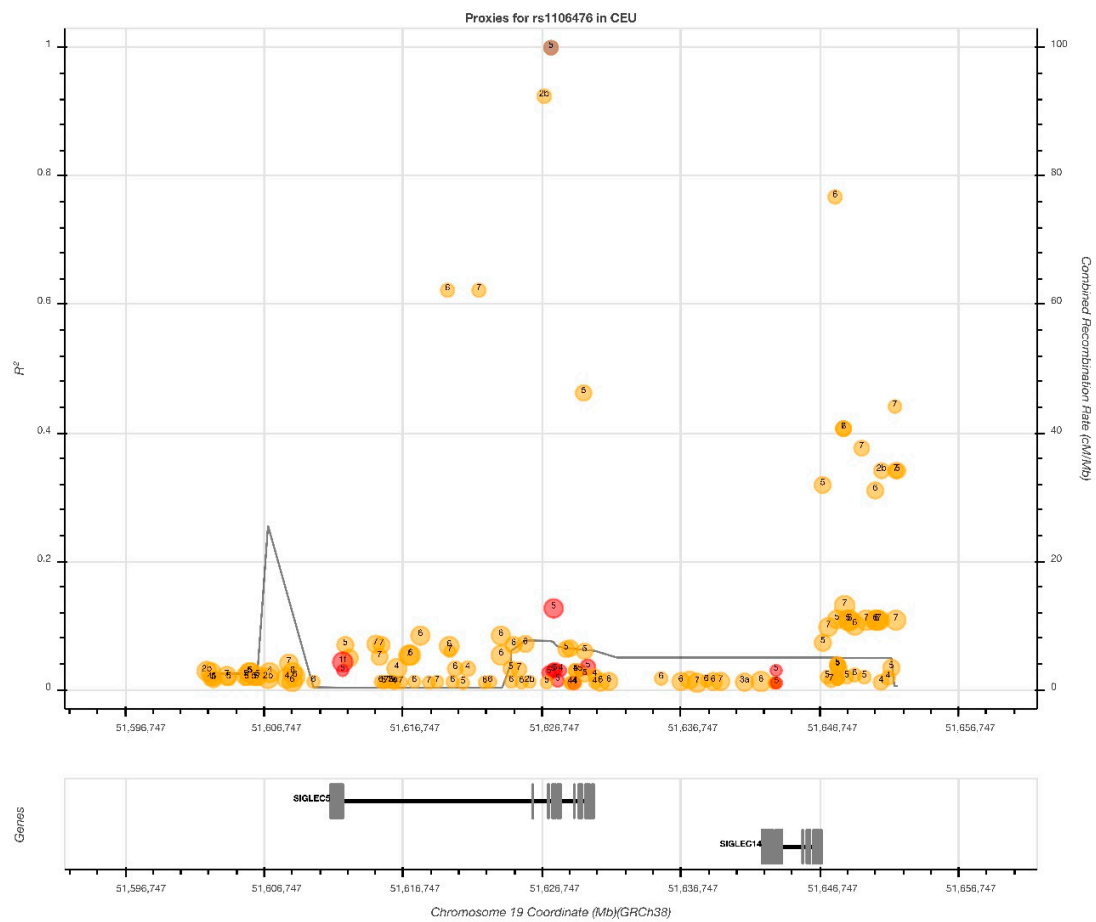

**Figure S5.** *SIGLEC5* and *SIGLEC14* share a broad recombination peak (gray line). Note that, since *SIGLEC14* and *SIGLEC5* are on the minus strand, these genes appear inverted in this figure and read right-to-left.

**Table S1:** Provided as a .csv file. Contains all 187 ITIM/ITAM genes used in the analysis, including aliases.
