# Supplementary material for: Analysis of Genetic Variants Associated with Levels of Immune Modulating Proteins for Impact on Alzheimer’s Disease Risk Reveal a Potential Role for SIGLEC14
Source: Genes (Basel). 2021 Jun 30;12(7):1008. doi: 10.3390/genes12071008 (PMC8303736; doi:10.3390/genes12071008)
Supplement: Supplementary file 1 [file genes-12-01008-s001.zip › Supplemental Table 1.csv]

Name	Alias 1	Alias 2
CLEC1A
CLEC1B
CLEC2A
CLEC2B
CD69	CLEC2C
CLEC2D
CLEC2L
CLEC3A
CLEC3B
CLEC4A
CLEC4C
CLEC4D
CLEC4E
CLEC4F
CLEC4G
ASGR1	CLEC4H1
ASGR2	CLEC4H2
FCER2	CLEC4J	CD23
CD207	CLEC4K
CD209	CLEC4L
CLEC4M
CLEC5A
CLEC6A
CLEC7A
OLR1	CLEC8A
CLEC9A
CLEC10A
CLEC11A
CLEC12A
CLEC12B
CD302	CLEC13A
LY75	CLEC13B	CD205
PLA2R1	CLEC13C
MRC1	CLEC13D	CD206
MRC2	CLEC13E	CD280
CLEC14A
CLEC16A
CLEC17A
KLRA1
KLRB1	CLEC5B	NK1.1
KLRC1
KLRC2
KLRC3
KLRC4
KLRD1
KLRF1	CLEC5C
KLRG1	CLEC15A
KLRG2	CLEC15B
KLRK1
AGC1
ATRNL1
BCAN
CD248
CD72
CD93
CHODL
CL-K1-Ia
CL-K1-Ib
CL-K1-Ic
CLECSF5
COLEC10
COLEC11
COLEC12
CSPG3
FCER2
FREM1
HBXBP
LAYN
LOC348174
LOC728276
MAFA
MBL2
MGC34761
MICL
MRC1L1
OLR1
PAP
PKD1
PKD1L2
PLA2R1
PRG2
PRG3
REG1A
REG1B
REG3A
REG3G
REG4
SELE
SELL
SELP
SFTPA1
SFTPA2
SFTPA2B
SFTPD
SRCL
THBD
VCAN
CD64
CD32
CD16a
CD16b
Fcer1
FCD23
CD89
Fcamr
Fcrn
Fcrl1
Fcrl2
Fcrl3
Fcrl4
Fcrl5
Fcrl6
Fcrla
Fcrlb
Kir2dl1
Kir2dl2
Kir2dl3
Kir2dl4
Kir2dl5a
Kir2dl5b
Kir2ds1
Kir2ds2
Kir2ds3
Kir2ds4
Kir2ds5
Kir3dl1
Kir3dl2
Kir3dl3
Kir3ds1
LILRA1
LILRA2
LILRA3
LILRA4
LILRA5
LILRA6
LILRB1
LILRB2
LILRB3
LILRB4
LILRB5
LILRB6
LILRB7
LILRA6
LILRA5
Siglec-1
Siglec-2	CD22
Siglec-3	CD33
Siglec-4	MAG
Siglec-5
Siglec-5
Siglec-6
Siglec-7
Siglec-8
Siglec-9
Siglec-10
Siglec-11
Siglec-12
Siglec-13
Siglec-14
Siglec-15
Siglec-16
Siglec-17
SLAMF1	CD150
SLAMF2	CD48
SLAMF3	CD229	LY9
SLAMF4	CD244
SLAMF5	CD84
SLAMF6	CD352
SLAMF7	CD319	CRACC
SLAMF8	CD353
SLAMF9
NKp44
NKp46
NKp30
Pilra
Pilrb
CD28
ICOS
BTLA
CTLA-4
PD-1
CD200R1
CD5
CD6
LAIR1
GPVI
OSCAR
